# Supplementary material
Source: Springer Nature journal article supplement (https://www.springermedizin.de/resource/supplementary/12985_2010_1019_MOESM4_ESM.pdf/9608966)

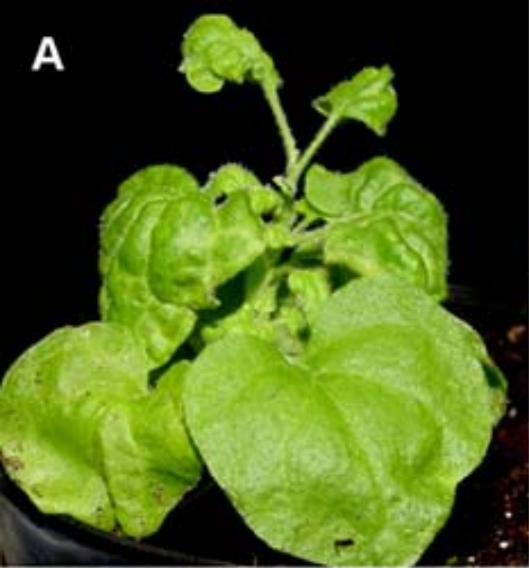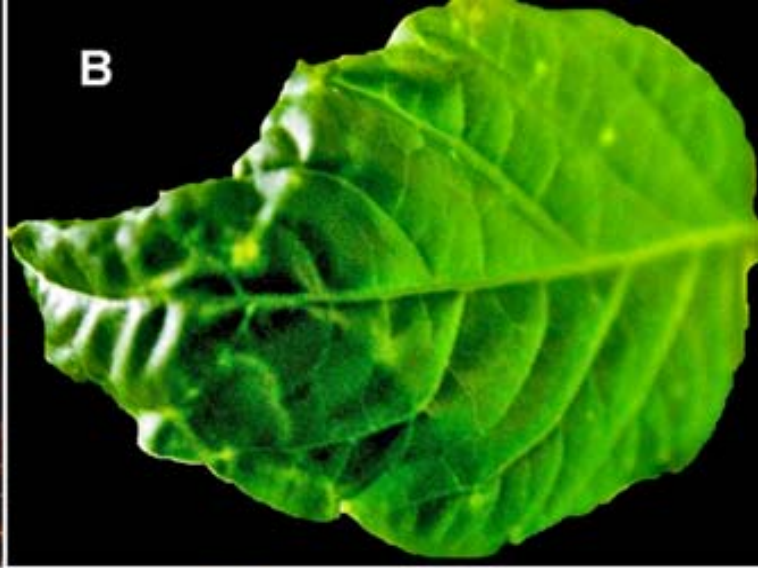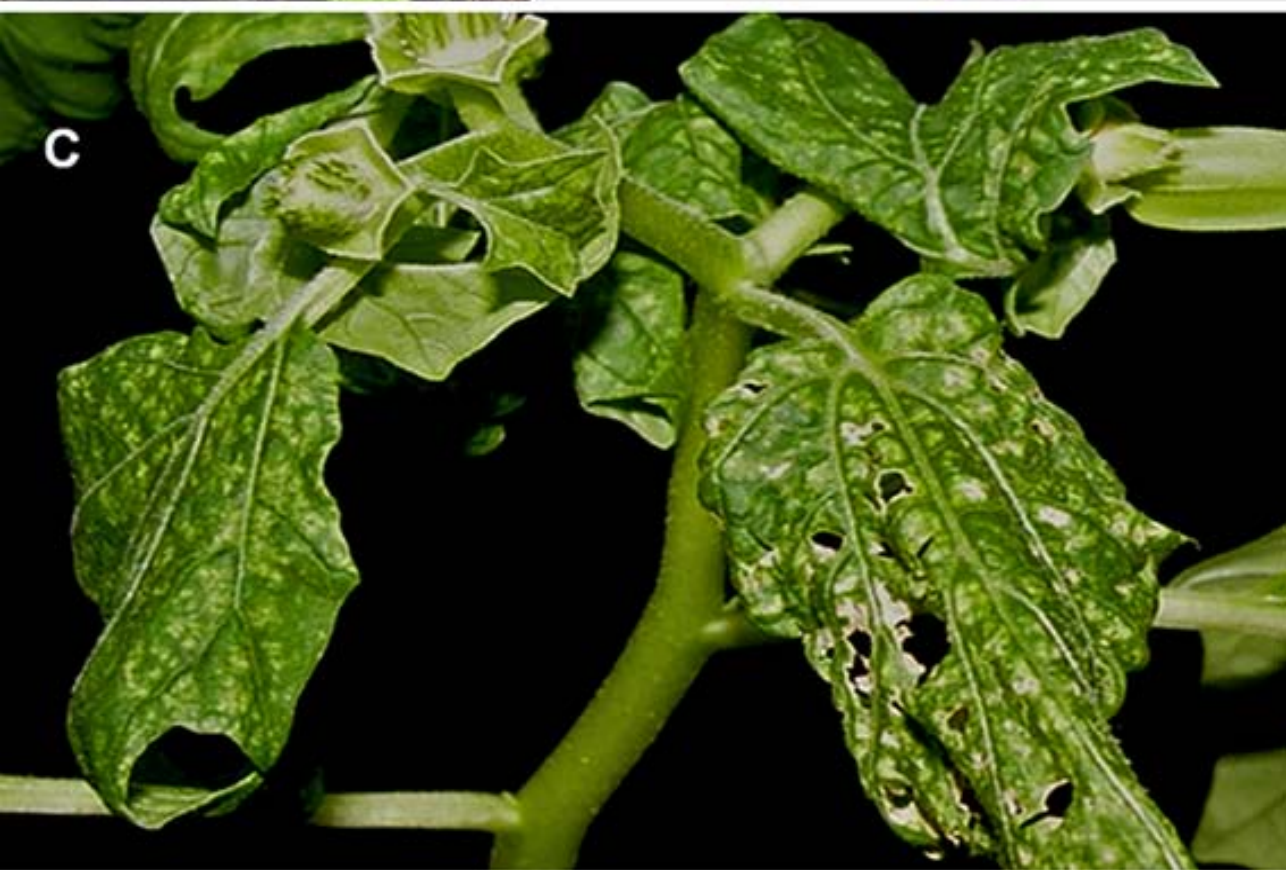

Supplement: MOESM4 [file 9608966]
